# Supplementary material
Source: PubMed Central journal article supplement (PMC6340486)
Supplement: NIHMS81266-supplement-1.pdf [file NIHMS81266-supplement-1.pdf]

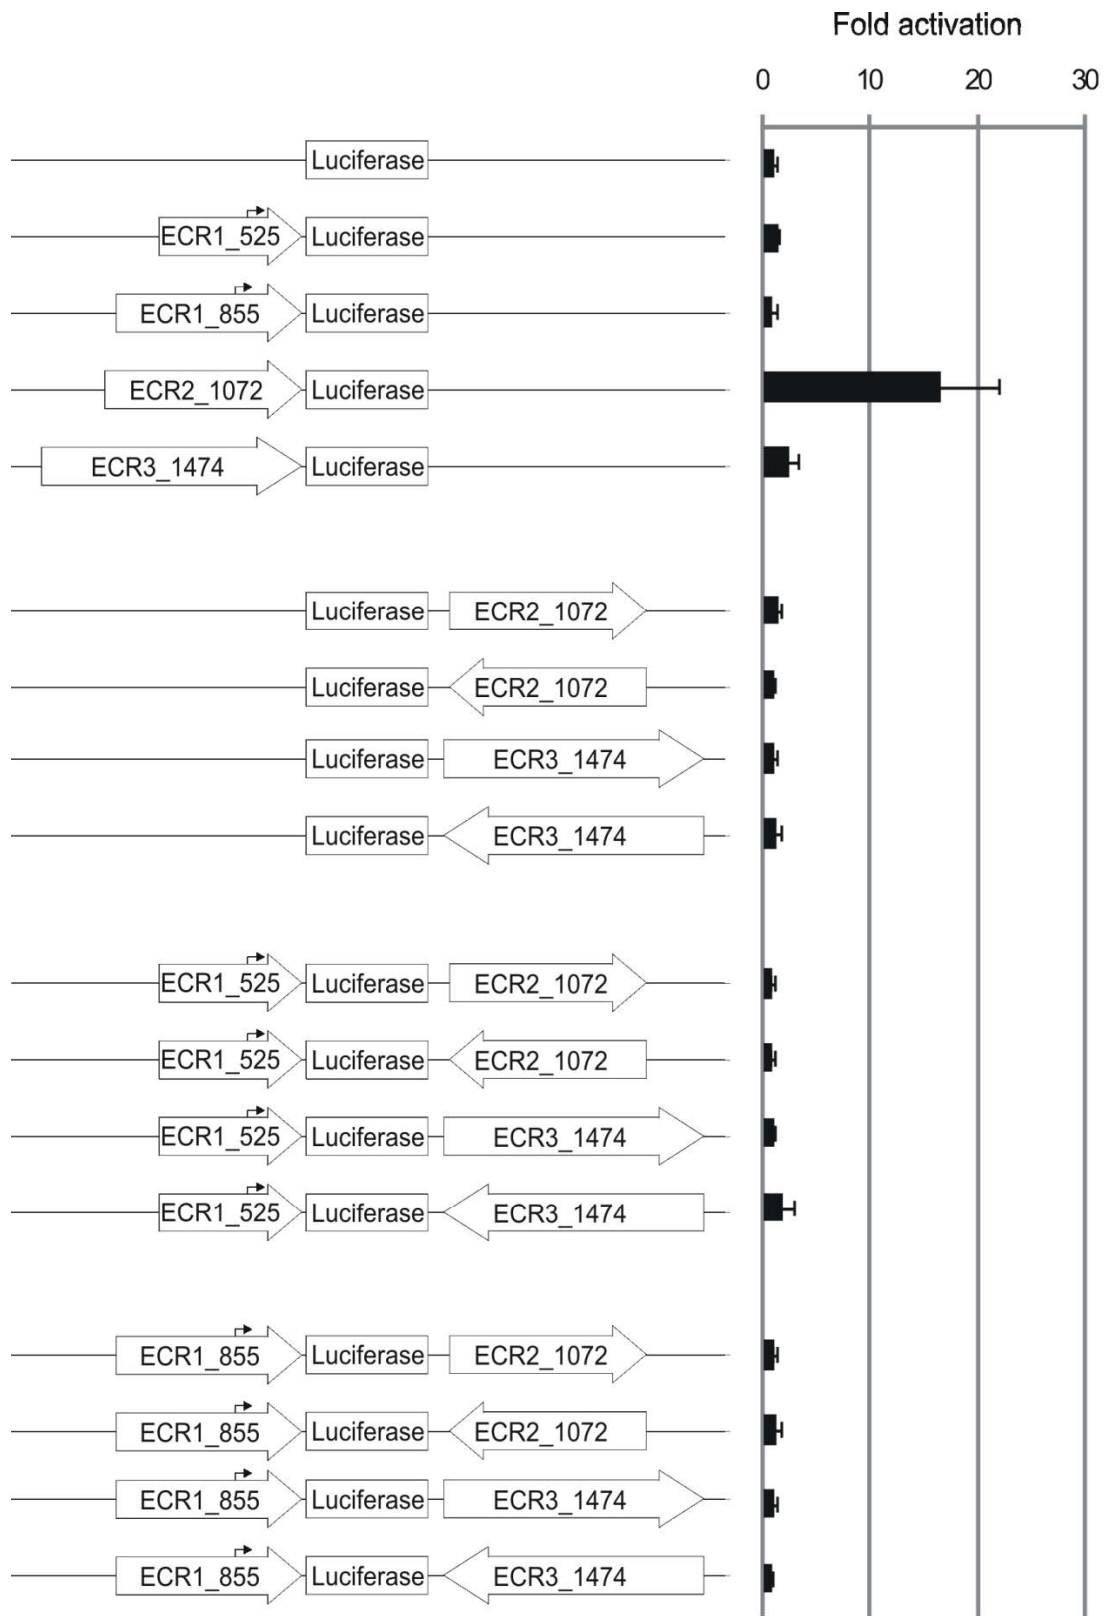

Figure S1

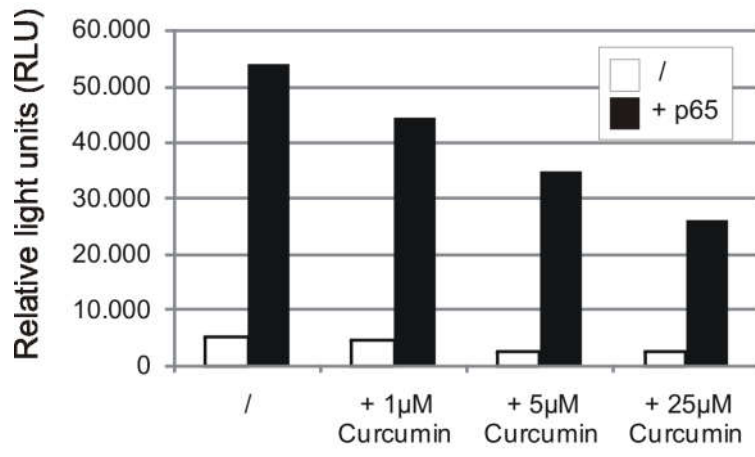

Figure S2

| Transcription factor | Sequence            | Start     | Score        |
|----------------------|---------------------|-----------|--------------|
| <b>Elk-1</b>         | <b>CTTCAGATTC</b>   | <b>9</b>  | <b>7.052</b> |
| SPI-1                | CTTCAG              | 9         | 5.359        |
| Irf-1                | AGATTCTCTT<br>TC    | 13        | 8.520        |
| GATA-3               | TTCTCT              | 16        | 4.087        |
| Dof2                 | CTCTTT              | 18        | 5.916        |
| Dof3                 | CTCTTT              | 18        | 5.352        |
| Gklf                 | CTCTTTCTTT          | 18        | 7.620        |
| Gklf                 | TCTTTCTTTC          | 19        | 5.297        |
| MNB1A                | TCTTT               | 19        | 6.786        |
| PBF                  | TCTTT               | 19        | 5.740        |
| Gklf                 | CTTTCTTTCC          | 20        | 5.621        |
| SPI-1                | CTTTCT              | 20        | 4.721        |
| Dof2                 | TTCTTT              | 22        | 6.891        |
| Dof3                 | TTCTTT              | 22        | 4.846        |
| Gklf                 | TCTTTCCCCA          | 23        | 5.420        |
| MNB1A                | TCTTT               | 23        | 6.786        |
| PBF                  | TCTTT               | 23        | 5.740        |
| Gklf                 | CTTTCCCCAG          | 24        | 5.389        |
| SPI-1                | CTTTCC              | 24        | 5.116        |
| SPI-1                | TTTCCC              | 25        | 5.702        |
| MZF_5-13             | TTCCCCAGA<br>G      | 26        | 7.301        |
| SPI-B                | TTCCCCA             | 26        | 8.183        |
| MZF_1-4              | TCCCCA              | 27        | 9.085        |
| Nkx                  | CAATAT              | 41        | 4.868        |
| <b>GATA-1</b>        | <b>ATATCC</b>       | <b>44</b> | <b>5.111</b> |
| GATA-3               | ATATCC              | 44        | 4.250        |
| GATA-2               | TATCC               | 45        | 6.651        |
| SPI-B                | ATCCTCT             | 46        | 6.769        |
| MZF_1-4              | TCCTCT              | 47        | 5.322        |
| GATA-3               | CTCTCA              | 49        | 4.990        |
| <b>c-FOS</b>         | <b>TCACTCAC</b>     | <b>52</b> | <b>8.072</b> |
| Ahr-ARNT             | CACTCA              | 53        | 5.297        |
| GATA-3               | CACTCA              | 53        | 4.024        |
| SOX17                | CAGAATGGT           | 59        | 5.720        |
| Yin-Yang             | AATGGT              | 62        | 7.027        |
| deltaEF1             | ATGGTG              | 63        | 4.388        |
| SP1                  | TGCCTGCCT<br>C      | 73        | 6.965        |
| AP2alpha             | GCCTCGGGT           | 78        | 4.313        |
| TBP                  | CCCTGTGATT<br>TATTT | 90        | 6.088        |
| Gklf                 | CCTGTGATTT          | 91        | 4.986        |
| Gfi                  | CTGTGATTTA          | 92        | 12.073       |
| Pax-2                | CTGTGATT            | 92        | 5.062        |
| EN-1                 | GTGATTTATT<br>T     | 94        | 4.504        |
| SRY                  | TTTATTTTA           | 98        | 6.434        |
| FREAC-7              | TATTTTAG            | 100       | 4.332        |
| SPI-1                | GTTCTT              | 107       | 4.249        |
| Dof2                 | TTCTTT              | 108       | 6.891        |
| Dof3                 | TTCTTT              | 108       | 4.846        |
| MNB1A                | TCTTT               | 109       | 6.786        |
| PBF                  | TCTTT               | 109       | 5.740        |
| Gklf                 | CTTTTCCCTT          | 110       | 8.951        |
| Gklf                 | TTTTCCCTTG          | 111       | 5.512        |
| SPI-1                | TTTCCC              | 112       | 5.702        |
| SPI-B                | TTTCCCT             | 112       | 4.764        |
| SPI-B                | TTCCCTT             | 113       | 6.493        |

|               |                      |            |              |
|---------------|----------------------|------------|--------------|
| Gklf          | CCCTTGTTTT           | 115        | 8.182        |
| SOX-9         | CCCTTGTTT            | 115        | 8.127        |
| Gklf          | CCTTGTTTTT           | 116        | 8.385        |
| Gklf          | CTTGTTTTT            | 117        | 6.353        |
| SRY           | CTTGTTTTT            | 117        | 7.589        |
| Sox-5         | CTTGTTT              | 117        | 6.563        |
| HMG-IY        | TTGTTTTTTTT<br>TTTTC | 118        | 10.515       |
| Gklf          | GTTTTTTTTT           | 120        | 4.950        |
| Gklf          | TTTTTTTTTT           | 121        | 5.398        |
| Gklf          | TTTTTTTTTT           | 122        | 5.398        |
| Gklf          | TTTTTTTTTT           | 123        | 5.398        |
| FREAC-7       | TATACACT             | 140        | 4.435        |
| FREAC-3       | TACACTTT             | 142        | 4.823        |
| Dof2          | CACTTT               | 144        | 5.518        |
| Dof3          | CACTTT               | 144        | 8.349        |
| Nkx           | CACTTTT              | 144        | 4.772        |
| MNB1A         | ACTTT                | 145        | 6.786        |
| PBF           | ACTTT                | 145        | 7.325        |
| Gklf          | CTTTTGTTTT           | 146        | 8.140        |
| SOX-9         | CTTTTGTTT            | 146        | 8.467        |
| SRY           | TTTGTTTTA            | 148        | 9.474        |
| Sox-5         | TTTGTTT              | 148        | 6.563        |
| Gfi           | CTGTGGTTTC           | 161        | 6.578        |
| SPI-B         | TTTCTCA              | 167        | 5.592        |
| <b>c-FOS</b>  | <b>TTTCTCAT</b>      | <b>167</b> | <b>6.556</b> |
| GATA-3        | TTCTCA               | 168        | 3.791        |
| Ubx           | ATGA                 | 173        | 3.366        |
| EN-1          | GAGCCCTATT<br>A      | 175        | 4.702        |
| Nkx           | CTATTAT              | 180        | 7.738        |
| Ubx           | ATTA                 | 182        | 6.917        |
| <b>GATA-1</b> | <b>TTATCT</b>        | <b>183</b> | <b>4.460</b> |
| GATA-3        | TTATCT               | 183        | 7.189        |
| FREAC-7       | TATCTCAT             | 184        | 5.530        |
| GATA-2        | TATCT                | 184        | 6.232        |
| SOX-9         | TCATTGATA            | 188        | 7.592        |
| Pax-2         | CATTGATA             | 189        | 4.238        |
| SRY           | ATTGATACC            | 190        | 7.100        |
| Sox-5         | ATTGATA              | 190        | 6.624        |
| FREAC-3       | TACCTCTC             | 195        | 4.249        |
| SPI-B         | TACCTCT              | 195        | 6.292        |
| Gklf          | CCTCTCACCT           | 197        | 5.047        |
| GATA-3        | CTCTCA               | 198        | 4.990        |
| Snail         | CACCTC               | 202        | 6.770        |
| c-ETS         | GGGAAG               | 217        | 5.777        |
| HFH-2         | AAGAAATCAT<br>AT     | 220        | 6.922        |
| c-ETS         | AAGAAA               | 220        | 3.658        |
| <b>GATA-1</b> | <b>AAATCA</b>        | <b>223</b> | <b>4.265</b> |
| GATA-3        | AAATCA               | 223        | 5.162        |
| GATA-2        | AATCA                | 224        | 4.000        |
| FREAC-7       | TATTTTCA             | 229        | 5.446        |
| deltaEF1      | CAGATG               | 235        | 4.562        |
| Pax-2         | AGATGACT             | 236        | 4.223        |
| Yin-Yang      | GATGAC               | 237        | 5.315        |
| Ubx           | ATGA                 | 238        | 3.366        |
| <b>c-FOS</b>  | <b>TGACTCGT</b>      | <b>239</b> | <b>6.456</b> |
| Agamous       | ACTCGTAAAG<br>G      | 241        | 5.998        |
| HFH-2         | AAAGAAAAA<br>AC      | 254        | 8.076        |
| RUSH1-alfa    | AAGAAAAA             | 255        | 4.882        |

|                  |                       |            |               |
|------------------|-----------------------|------------|---------------|
| c-ETS            | AAGAAA                | 255        | 3.658         |
| Dorsal_1         | AGAAAAAAC<br>CC       | 256        | 10.026        |
| Dorsal_1         | GAAAAAAC<br>CA        | 257        | 11.198        |
| HMG-1            | GAAAAAAC              | 257        | 7.168         |
| HMG-1            | AAAAAAC               | 258        | 4.824         |
| cEBP             | AAAATTTCAA<br>AA      | 268        | 8.287         |
| SAP-1            | ATTTCCGTT             | 279        | 8.615         |
| SQUA             | ATTTCCGTTT<br>AAGT    | 279        | 8.960         |
| E74A             | TTTCCGT               | 280        | 7.780         |
| <b>EIk-1</b>     | <b>TTTCCGTTTA</b>     | <b>280</b> | <b>8.664</b>  |
| SPI-1            | TTTCCG                | 280        | 5.834         |
| SPI-B            | TTCCGTT               | 281        | 7.514         |
| Ubx              | ATAA                  | 296        | 4.205         |
| GATA-1           | TAATCA                | 297        | 3.797         |
| GATA-3           | TAATCA                | 297        | 5.928         |
| S8               | TAATC                 | 297        | 5.937         |
| GATA-2           | AATCA                 | 298        | 4.000         |
| RUSH1-alfa       | AAGAAAAG              | 302        | 5.925         |
| c-ETS            | AAGAAA                | 302        | 3.658         |
| HMG-1            | GAAAAGGAG             | 304        | 6.170         |
| deltaEF1         | AAGGAG                | 307        | 5.159         |
| c-ETS            | AGGAGA                | 308        | 3.674         |
| RUSH1-alfa       | GAGAAACA              | 310        | 6.818         |
| <b>AML-1</b>     | <b>AAACACAGA</b>      | <b>313</b> | <b>6.667</b>  |
| RUSH1-alfa       | GAGAGAAA              | 324        | 4.946         |
| RUSH1-alfa       | GAGAAAAA              | 326        | 7.153         |
| HFH-2            | GAAAAAAAAA<br>AC      | 328        | 9.655         |
| HFH-2            | AAAAAAAAA<br>CT       | 329        | 6.666         |
| HFH-2            | AAAAAAAAAC<br>TA      | 330        | 6.540         |
| HMG-1            | AAAAAAAAAC            | 331        | 6.307         |
| HFH-2            | AAAAAACTA<br>TG       | 332        | 9.153         |
| HFH-1            | AAAAAACTAT<br>G       | 333        | 8.778         |
| EN-1             | AAAAAACTATG<br>A      | 334        | 5.329         |
| Ubx              | ACTA                  | 338        | 3.632         |
| GATA-3           | CTATGA                | 339        | 3.670         |
| FREAC-7          | TATGAGAA              | 340        | 4.984         |
| Ubx              | ATGA                  | 341        | 3.366         |
| Dorsal_1         | TGAGAACCC<br>CCC      | 342        | 9.040         |
| Dorsal_2         | TGAGAACCC<br>C        | 342        | 8.283         |
| p50              | TGAGAACCC<br>CC       | 342        | 9.779         |
| EN-1             | GAGAACCC<br>CC        | 343        | 5.216         |
| HMG-1            | GAGAACCC              | 343        | 4.747         |
| <b>NF-kappaB</b> | <b>GAGAACCC<br/>C</b> | <b>343</b> | <b>7.172</b>  |
| p50              | GAGAACCC<br>CC        | 343        | 8.513         |
| <b>SP1</b>       | <b>AGAACCC<br/>C</b>  | <b>344</b> | <b>6.409</b>  |
| <b>SP1</b>       | <b>AACCC<br/>C</b>    | <b>346</b> | <b>7.522</b>  |
| <b>SP1</b>       | <b>ACCC<br/>C</b>     | <b>347</b> | <b>10.768</b> |

|               |                       |            |              |
|---------------|-----------------------|------------|--------------|
|               | <b>C</b>              |            |              |
| Gklf          | CCCCCCCC<br>A         | 348        | 5.599        |
| MZF_1-4       | CCCCC                 | 348        | 5.636        |
| <b>SP1</b>    | <b>CCCCCCCC<br/>A</b> | <b>348</b> | <b>6.724</b> |
| MZF_1-4       | CCCCC                 | 349        | 5.636        |
| MZF_5-13      | CCCCCCCCA<br>C        | 349        | 5.993        |
| MZF_1-4       | CCCCC                 | 350        | 5.636        |
| MZF_5-13      | CCCCCCCCA<br>C        | 350        | 5.993        |
| MZF_1-4       | CCCCC                 | 351        | 5.636        |
| MZF_1-4       | CCCCCA                | 352        | 6.469        |
| <b>SP1</b>    | <b>CCCCACCC<br/>C</b> | <b>352</b> | <b>6.857</b> |
| Myc-Max       | ACCCCGTGA<br>TT       | 357        | 9.115        |
| Max           | CCCCGTGAT<br>T        | 358        | 8.059        |
| USF           | CCCCGTG               | 358        | 7.859        |
| ARNT          | CCCGTG                | 359        | 6.112        |
| n-MYC         | CCCGTG                | 359        | 6.133        |
| Gfi           | CCGTGATTAT            | 360        | 6.026        |
| Pax-2         | CCGTGATT              | 360        | 7.650        |
| Nkx           | TGATTAT               | 363        | 5.018        |
| Ubx           | ATTA                  | 365        | 6.917        |
| <b>GATA-1</b> | <b>TTATCA</b>         | <b>366</b> | <b>4.250</b> |
| GATA-3        | TTATCA                | 366        | 6.894        |
| GATA-2        | TATCA                 | 367        | 5.778        |
| Ahr-ARNT      | CACACA                | 375        | 6.158        |
| Ahr-ARNT      | CACTCA                | 379        | 5.297        |
| GATA-3        | CACTCA                | 379        | 4.024        |
| Nkx           | CACTCAT               | 379        | 4.410        |
| <b>GATA-1</b> | <b>TCATCG</b>         | <b>382</b> | <b>5.410</b> |
| GATA-3        | TCATCG                | 382        | 3.658        |
| GATA-2        | CATCG                 | 383        | 5.559        |
| Agamous       | AAAAAATTTG<br>G       | 389        | 6.385        |
| Athb-1        | AAAAATTT              | 390        | 6.726        |
| SQUA          | ATTTGGATTA<br>TTAG    | 394        | 7.425        |
| c-ETS         | TGGATT                | 397        | 4.241        |
| Nkx           | GGATTAT               | 398        | 4.441        |
| SRY           | ATTATTAGA             | 400        | 6.086        |
| Sox-5         | ATTATTA               | 400        | 7.499        |
| Ubx           | ATTA                  | 400        | 6.917        |
| Ubx           | ATTA                  | 403        | 6.917        |
| RUSH1-alfa    | GAGAGAGG              | 410        | 4.588        |
| AP2alpha      | GTCTGCGGC             | 417        | 6.773        |
| EN-1          | GGCTTCCAC<br>AC       | 423        | 4.750        |
| SPI-1         | CTTCCA                | 425        | 6.483        |
| Thing1-E47    | CTTCCACACC            | 425        | 6.063        |
| SPI-B         | TTCCACA               | 426        | 6.960        |
| MZF_1-4       | TCCACA                | 427        | 4.989        |
| FREAC-3       | TACAGCGT              | 436        | 5.238        |
| Myc-Max       | ACAGCGTGG<br>TT       | 437        | 7.989        |
| Pax-2         | GCGTGGTT              | 440        | 4.636        |
| Gklf          | TTTTTCTTCT            | 446        | 5.221        |
| SPI-B         | TTCTTCT               | 449        | 6.769        |
| SPI-1         | CTTCTC                | 451        | 5.496        |
| Ubx           | ATAA                  | 460        | 4.205        |

|          |                      |     |        |
|----------|----------------------|-----|--------|
| c-ETS    | AGCAAA               | 465 | 3.658  |
| MYB.ph3  | AAGTTGTTT            | 469 | 5.473  |
| deltaEF1 | AAGTTG               | 469 | 4.388  |
| TBP      | AGTTGTTTT<br>GATAC   | 470 | 5.709  |
| SRY      | GTTGTTTT             | 471 | 6.260  |
| Sox-5    | GTTGTTT              | 471 | 6.563  |
| USF      | ATACGTG              | 481 | 5.702  |
| ARNT     | TACGTG               | 482 | 6.112  |
| FREAC-3  | TACGTGAC             | 482 | 5.401  |
| deltaEF1 | TACGTG               | 482 | 5.555  |
| n-MYC    | TACGTG               | 482 | 5.992  |
| Pax-2    | ACGTGACA             | 483 | 8.533  |
| bZIP910  | ACGTGAC              | 483 | 5.723  |
| MYB.ph3  | TGACAGTTT            | 486 | 8.722  |
| SU_h     | TGACAGTTTC<br>CCACAA | 486 | 14.526 |
| GAMYB    | GACAGTTTCC           | 487 | 6.422  |

|               |                  |            |              |
|---------------|------------------|------------|--------------|
| Dof3          | CAGTTT           | 489        | 4.076        |
| SPI-1         | GTTTCC           | 491        | 4.264        |
| SPI-1         | TTTCCC           | 492        | 5.702        |
| MZF_1-4       | TTCCCA           | 493        | 4.846        |
| <b>AML-1</b>  | <b>TCCCACAAG</b> | <b>494</b> | <b>6.247</b> |
| MZF_1-4       | TCCCAC           | 494        | 5.004        |
| Thing1-E47    | AAGCCAGGC<br>T   | 500        | 8.157        |
| <b>GATA-1</b> | <b>TGATCC</b>    | <b>509</b> | <b>3.720</b> |
| GATA-2        | GATCC            | 510        | 5.047        |
| Dof2          | TCCTTT           | 512        | 6.493        |
| Dof3          | TCCTTT           | 512        | 6.702        |
| Gklf          | CCTTTTCTGT       | 513        | 5.738        |
| MNB1A         | CCTTT            | 513        | 4.751        |
| PBF           | CCTTT            | 513        | 5.740        |
| Gklf          | CTTTTCTGTC       | 514        | 4.990        |
| SPI-B         | TTTCTGT          | 516        | 5.356        |

**Figure S3**
